# Supplementary material
Source: MDPI journal article supplement (https://www.mdpi.com/2571-8789/7/1/10)
Supplement: s1 [file s1]

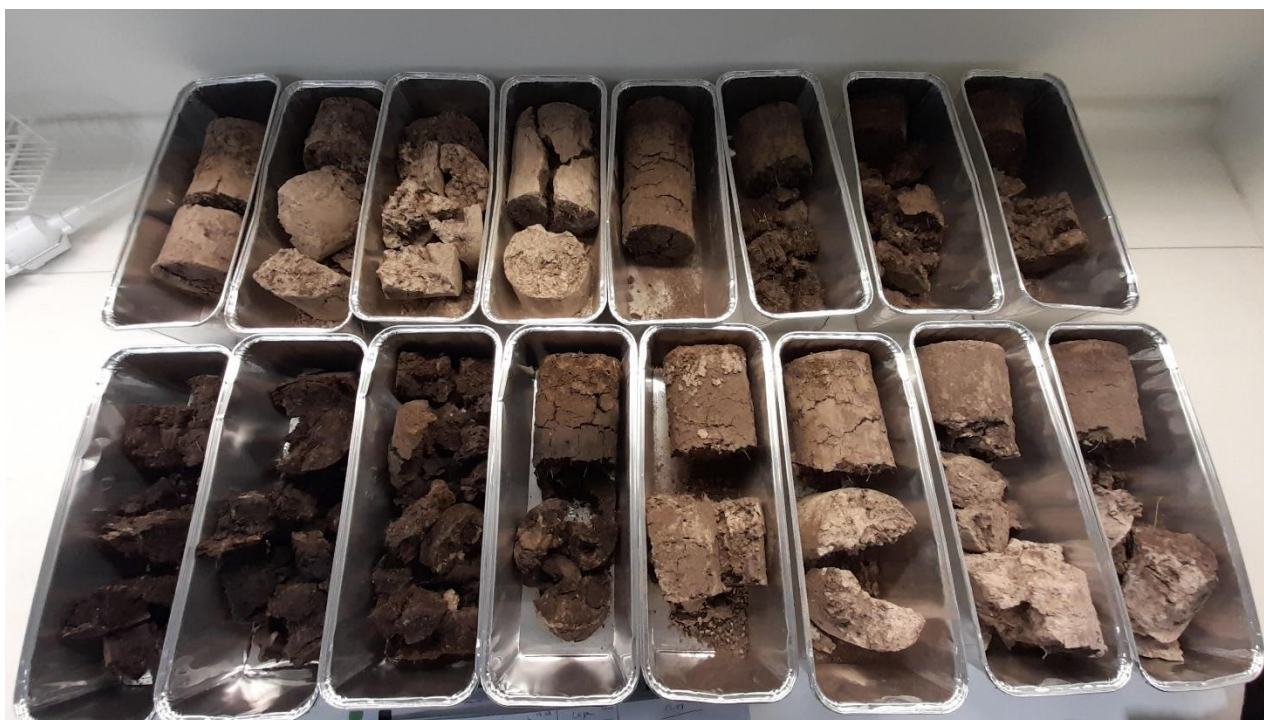

Figure S1: Picture, illustrating the differences in peat colour for the different plots and sub-plots. Lower row, trays 1-4: plot 12, trays 5-8: plot 13. Top row, trays 1-4: plot 19, trays 5-8: plot 22

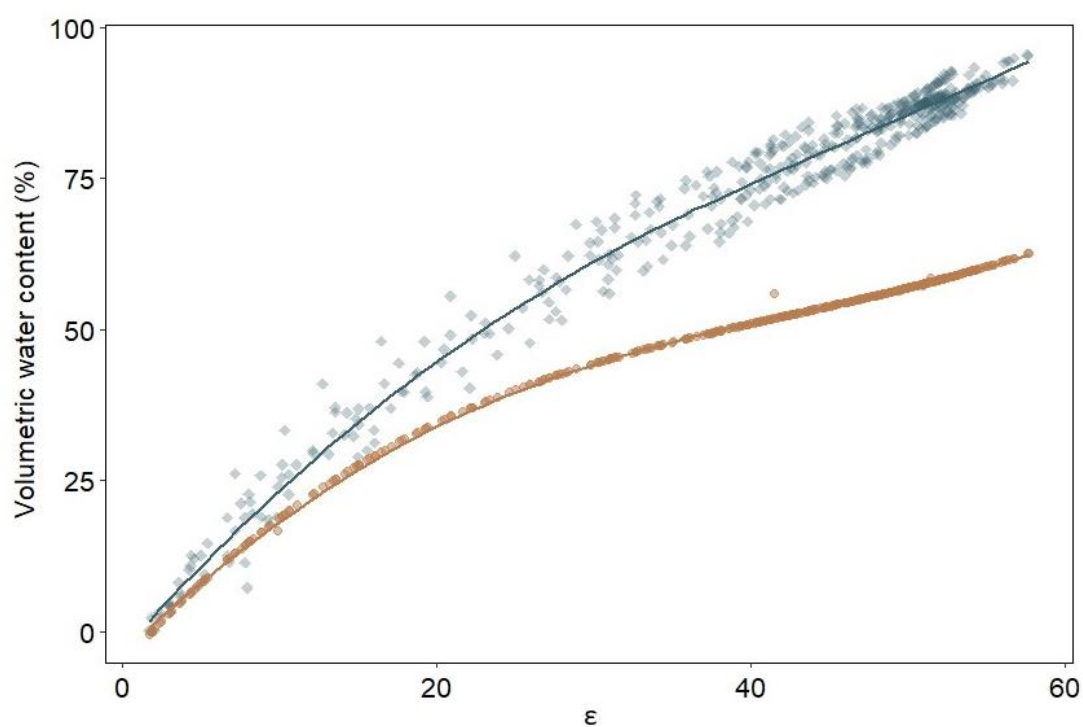

Figure S2: Difference between measured (brown) and corrected (blue) water contents in dependence to  $\epsilon$  (K) across plots

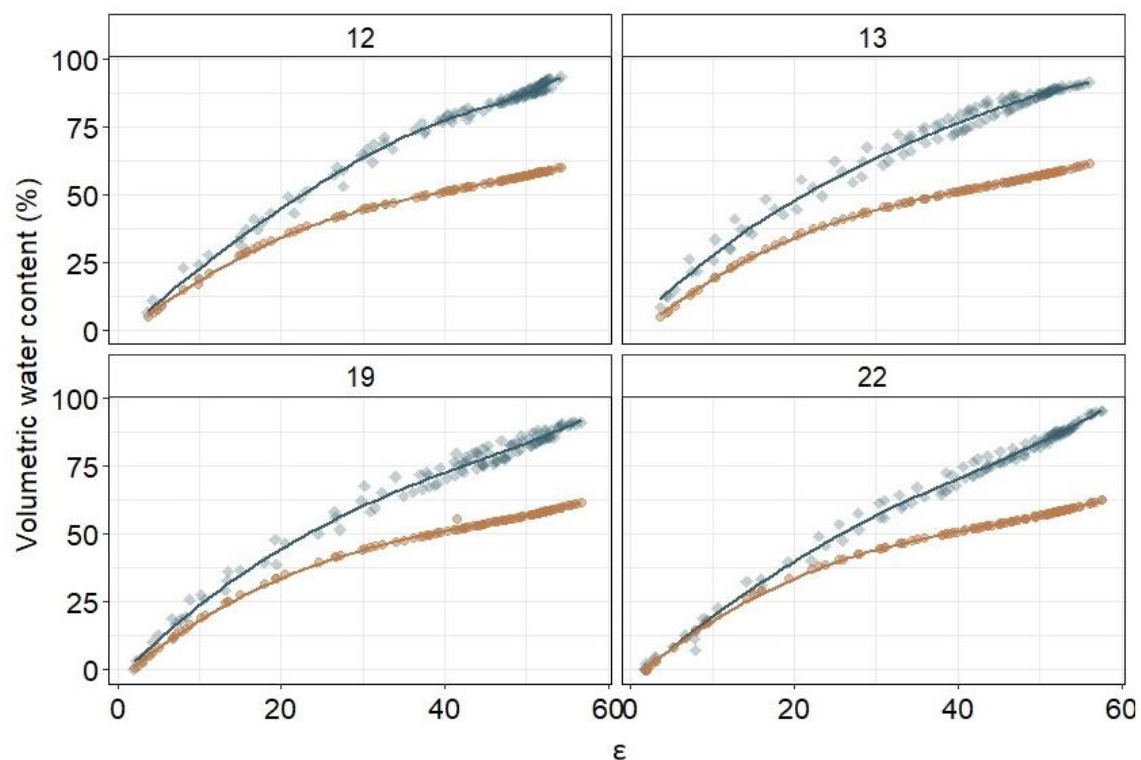

Figure S3: Difference between measured (brown) and corrected (blue) water contents in dependence to  $\epsilon$  (K) for each plot

Table S1: Outcomes regarding the modelled contents of organic carbon derived by the generalized additive models (GAM) as described in Table 1 for all plots and subplots as indicated by annual number of cuts. OC (%) in green indicates actual measured values. Standard error ( $n =$  between 29 and 31) is given in brackets

| Plot | OC (%)        | WK            | WKV           | WKD           | WKS           | WKC           | WKCV          | WKvP          | WKBD          |
|------|---------------|---------------|---------------|---------------|---------------|---------------|---------------|---------------|---------------|
| 12   | 44.6          | 31.1          | 46.1          | 41.3          | 46.1          | 45.1          | 45.1          | 45.1          | 34.8          |
|      | ( $\pm 0.2$ ) | ( $\pm 0.5$ ) | ( $\pm 0.9$ ) | ( $\pm 0.7$ ) | ( $\pm 0.9$ ) | ( $\pm 0.5$ ) | ( $\pm 0.5$ ) | ( $\pm 0.5$ ) | ( $\pm 0.8$ ) |
| 13   | 26.5          | 31.1          | 28.6          | 26.5          | 28.6          | 25.8          | 25.8          | 25.8          | 27.7          |
|      | ( $\pm 0.2$ ) | ( $\pm 0.3$ ) | ( $\pm 0.7$ ) | ( $\pm 0.5$ ) | ( $\pm 0.7$ ) | ( $\pm 0.3$ ) | ( $\pm 0.3$ ) | ( $\pm 0.3$ ) | ( $\pm 0.6$ ) |
| 19   | 23.3          | 31.3          | 29.9          | 34.0          | 29.9          | 26.3          | 26.3          | 26.3          | 29.1          |
|      | ( $\pm 0.1$ ) | ( $\pm 0.3$ ) | ( $\pm 0.8$ ) | ( $\pm 0.6$ ) | ( $\pm 0.8$ ) | ( $\pm 0.4$ ) | ( $\pm 0.4$ ) | ( $\pm 0.4$ ) | ( $\pm 0.7$ ) |
| 22   | 36.9          | 31.3          | 29.8          | 30.5          | 29.8          | 37.8          | 37.8          | 37.8          | 35.2          |
|      | ( $\pm 0.4$ ) | ( $\pm 0.4$ ) | ( $\pm 0.7$ ) | ( $\pm 0.6$ ) | ( $\pm 0.7$ ) | ( $\pm 0.4$ ) | ( $\pm 0.4$ ) | ( $\pm 0.4$ ) | ( $\pm 0.9$ ) |

Table S2: Outcomes regarding the modelled contents of organic carbon derived by the generalized additive models (GAM) as described in Table 2 for all plots and subplots as indicated by annual number of cuts. OC (%) in green indicates actual measured values. Standard error (n = 32) is given in brackets.

| Plot | OC (%) | WKI    | WKVI   | WKDI   | WKSI   | WKCI   | WKCVI  | WKvPI  | WKBDI  |
|------|--------|--------|--------|--------|--------|--------|--------|--------|--------|
| 12   | 44.6   | 38.2   | 44.7   | 42.6   | 44.7   | 44.7   | 44.7   | 44.7   | 40.3   |
|      | (±0.2) | (±0.4) | (±0.2) | (±0.2) | (±0.2) | (<0.1) | (±0.2) | (<0.1) | (±0.3) |
| 13   | 26.5   | 31.3   | 27.4   | 26.8   | 27.4   | 25.6   | 27.4   | 25.6   | 27.9   |
|      | (±0.2) | (±0.3) | (±0.1) | (±0.2) | (±0.1) | (<0.1) | (±0.1) | (<0.1) | (±0.3) |
| 19   | 23.3   | 29.3   | 28.3   | 30.7   | 28.3   | 25.1   | 28.3   | 25.1   | 27.8   |
|      | (±0.1) | (±0.3) | (±0.2) | (±0.3) | (±0.2) | (<0.1) | (±0.2) | (<0.1) | (±0.5) |
| 22   | 36.9   | 33.3   | 31.8   | 32.1   | 31.8   | 36.8   | 31.8   | 36.8   | 36.2   |
|      | (±0.4) | (±0.4) | (±0.3) | (±0.3) | (±0.3) | (±0.1) | (±0.3) | (±0.1) | (±0.5) |

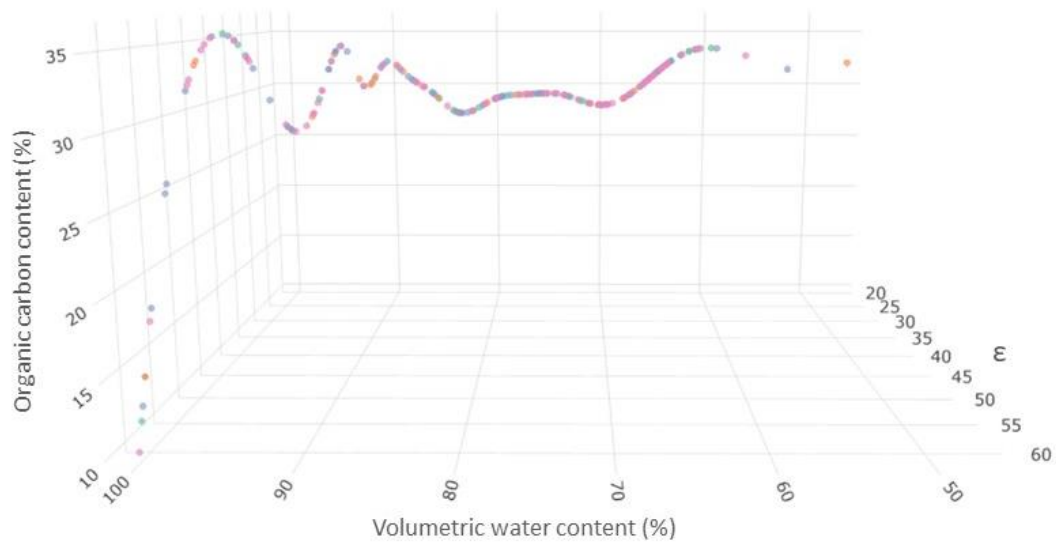

Figure S4: Available online as interactive html version under: <https://github.com/ClaudiNielsen/Supplementary-material-TDR-paper/blob/main/3dplot%20Vejr%20WK.html>

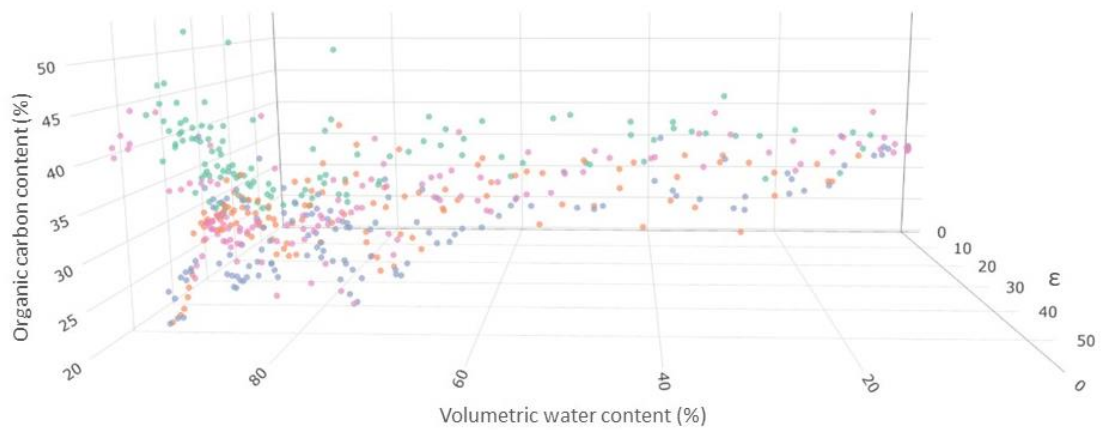

Figure S5: Available online as interactive html version under: <https://github.com/ClaudiNielsen/Supplementary-material-TDR-paper/blob/main/3dplot%20IMP%20WKI.html>

All 3D interactive models are available online under the github repository:

<https://github.com/ClaudiNielsen/Supplementary-material-TDR-paper>

Figures 4a and 3b are explicitly found under:

4a: <https://github.com/ClaudiNielsen/Supplementary-material-TDR-paper/blob/main/3dplot%20Vejr%20WKvP.html>

4b: <https://github.com/ClaudiNielsen/Supplementary-material-TDR-paper/blob/main/3dplot%20IMP%20WKvPI.html>

By downloading the html content – the plots can be moved and viewed in any html viewer by copy & paste the code.

Table S3: Extended table showing the general additive models (GAM) used for modelling of organic carbon (OC) by TDR measurements (continuous variables) and peat substrate bioindices (categorical variables), showing the code formula applied in the statistical platform R in the mgcv package.

| Model name | Continuous variables included<br>(Smooth terms, $f_1$ ) | Categorical variables included<br>(Parametric coefficients, $\beta_{1,2}$ ) | Model formula (R code)                                                                       |
|------------|---------------------------------------------------------|-----------------------------------------------------------------------------|----------------------------------------------------------------------------------------------|
| WK         | $\theta_{\text{cor}}(W), \varepsilon(K)$                | -                                                                           | $\text{OC} \sim \text{ti}(W, K, k = 10) + 0$                                                 |
| WKV        | $\theta_{\text{cor}}(W), \varepsilon(K)$                | Vegetation (V)                                                              | $\text{OC} \sim \text{ti}(W, K, k = 10) + \text{Veg} + 0$                                    |
| WKD        | $\theta_{\text{cor}}(W), \varepsilon(K)$                | Distance to river and ditch (D)                                             | $\text{OC} \sim \text{ti}(W, K, k = 10) + \text{Distance2} + \text{Distance} + 0$            |
| WKS        | $\theta_{\text{cor}}(W), \varepsilon(K)$                | Silt content (S)                                                            | $\text{OC} \sim \text{ti}(W, K, k = 10) + \text{Silt} + 0$                                   |
| WKC        | $\theta_{\text{cor}}(W), \varepsilon(K)$                | Peat colour (C)                                                             | $\text{OC} \sim \text{ti}(W, K, k = 10) + \text{Colour} + 0$                                 |
| WKCV       | $\theta_{\text{cor}}(W), \varepsilon(K)$                | Peat colour + Vegetation (CV)                                               | $\text{OC} \sim \text{ti}(W, K, k = 10) + \text{Colour} + \text{Veg} + 0$                    |
| WKvP       | $\theta_{\text{cor}}(W), \varepsilon(K)$                | Von Post scale of humification (vP)                                         | $\text{OC} \sim \text{ti}(W, K, k = 10) + \text{vP} + 0$                                     |
| WKBD       | $\theta_{\text{cor}}(W), \varepsilon(K)$                | Bulk density (BD)                                                           | $\text{OC} \sim \text{ti}(W, K, k = 10) + \text{BD} + 0$                                     |
| WKI        | $\theta_{\text{cor}}(W), \varepsilon(K), Z(I)$          | -                                                                           | $\text{OC} \sim \text{ti}(W, K, \text{IMP}, k = 5) + 0$                                      |
| WKVI       | $\theta_{\text{cor}}(W), \varepsilon(K), Z(I)$          | Vegetation (V)                                                              | $\text{OC} \sim \text{ti}(W, K, \text{IMP}, k = 5) + \text{Veg} + 0$                         |
| WKDI       | $\theta_{\text{cor}}(W), \varepsilon(K), Z(I)$          | Distance to river and ditch (D)                                             | $\text{OC} \sim \text{ti}(W, K, \text{IMP}, k = 5) + \text{Distance2} + \text{Distance} + 0$ |
| WKSI       | $\theta_{\text{cor}}(W), \varepsilon(K), Z(I)$          | Silt content (S)                                                            | $\text{OC} \sim \text{ti}(W, K, \text{IMP}, k = 5) + \text{Silt} + 0$                        |
| WKCI       | $\theta_{\text{cor}}(W), \varepsilon(K), Z(I)$          | Peat colour (C)                                                             | $\text{OC} \sim \text{ti}(W, K, \text{IMP}, k = 5) + \text{Colour} + 0$                      |
| WKCVI      | $\theta_{\text{cor}}(W), \varepsilon(K), Z(I)$          | Peat colour + Vegetation (CV)                                               | $\text{OC} \sim \text{ti}(W, K, \text{IMP}, k = 5) + \text{Colour} + \text{Veg} + 0$         |
| WKvPI      | $\theta_{\text{cor}}(W), \varepsilon(K), Z(I)$          | Von Post scale of humification (vP)                                         | $\text{OC} \sim \text{ti}(W, K, \text{IMP}, k = 5) + \text{vP} + 0$                          |
| WKBDI      | $\theta_{\text{cor}}(W), \varepsilon(K), Z(I)$          | Bulk density (BD)                                                           | $\text{OC} \sim \text{ti}(W, K, \text{IMP}, k = 5) + \text{BD} + 0$                          |

Following, the graphical model outputs are presented, where  $K$  is the dielectric permittivity,  $\text{Wat\_cal2}$  is the by TDR measured and by the polynomial regression corrected volumetric water content. The seven figures represent the generalized additive model (GAM) outputs for the models without impedance (IMP). Due to three continuous variables in the GAMs including IMP, no such figures can be printed. Figure captions give the model abbreviation, which details can be found in Table S3 and Table 2.

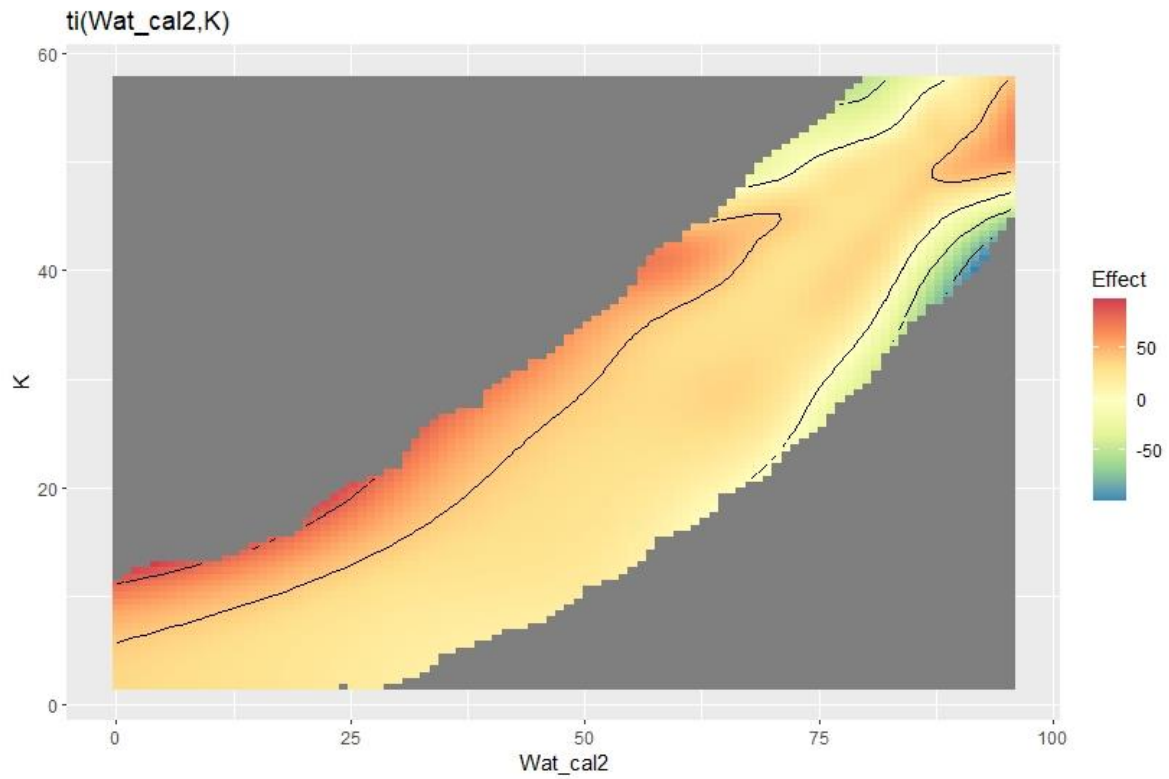

Figure S6: Model WK

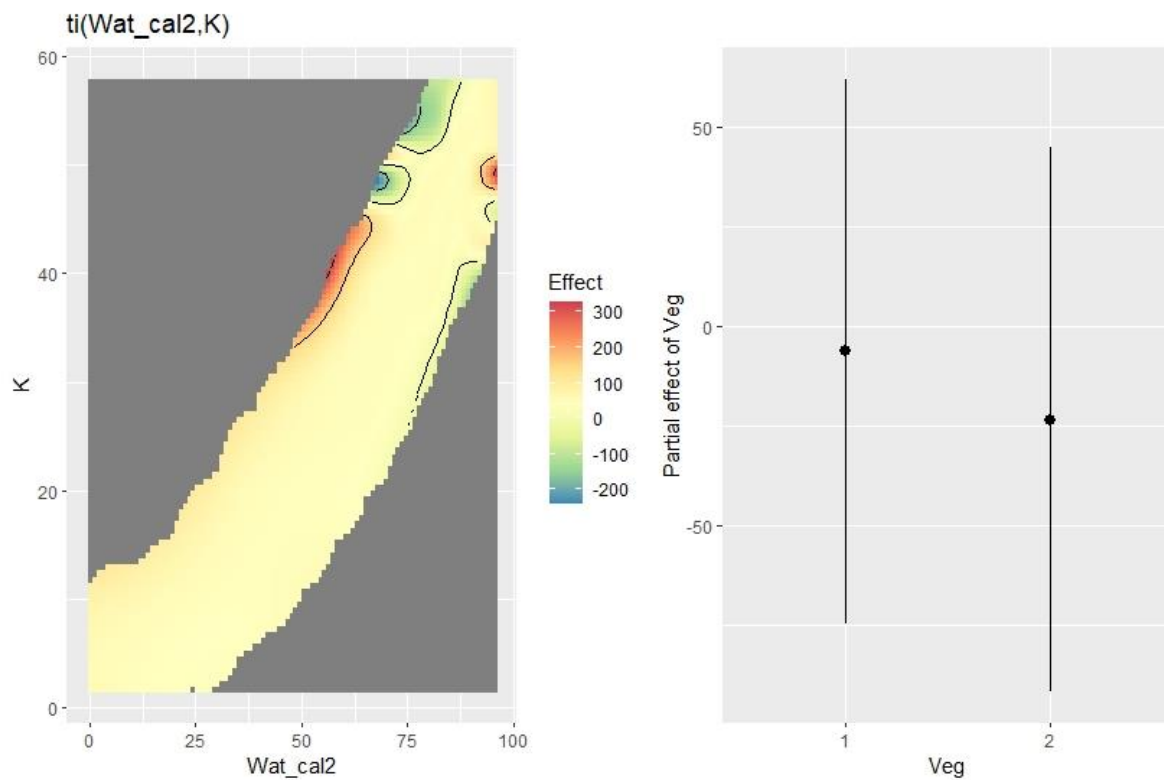

Figure S7: Model WKV

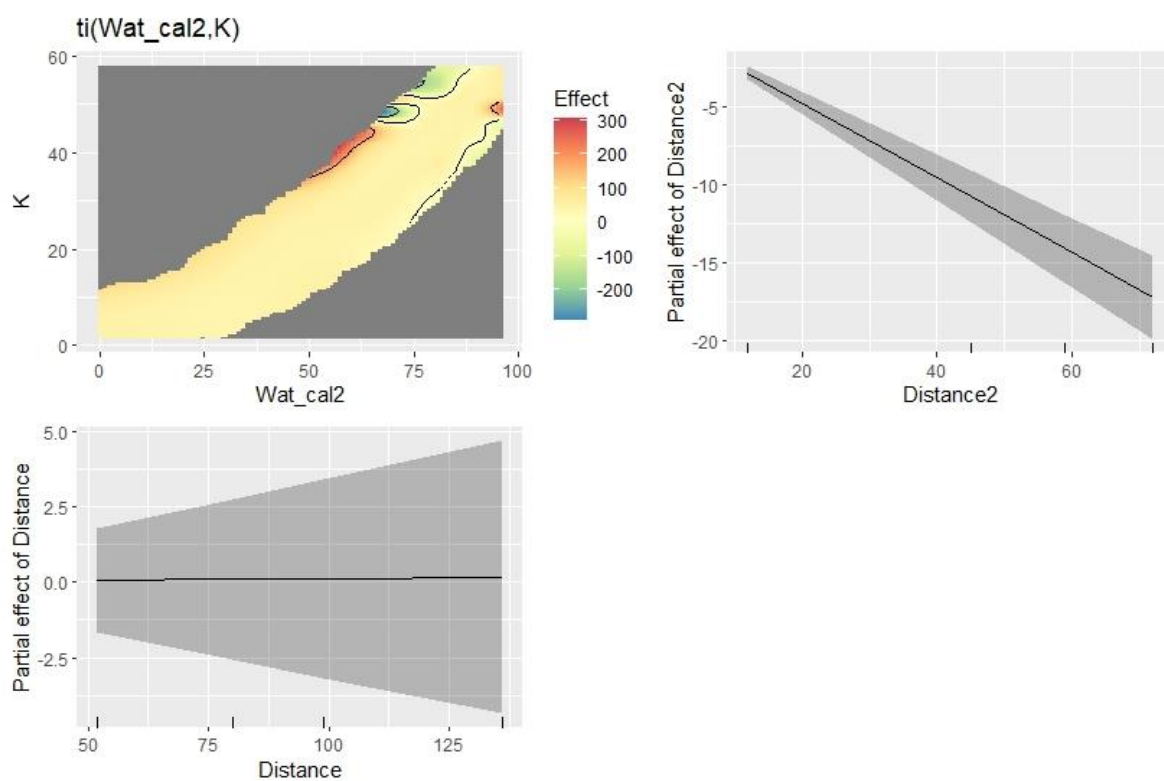

Figure S8: Model WKD



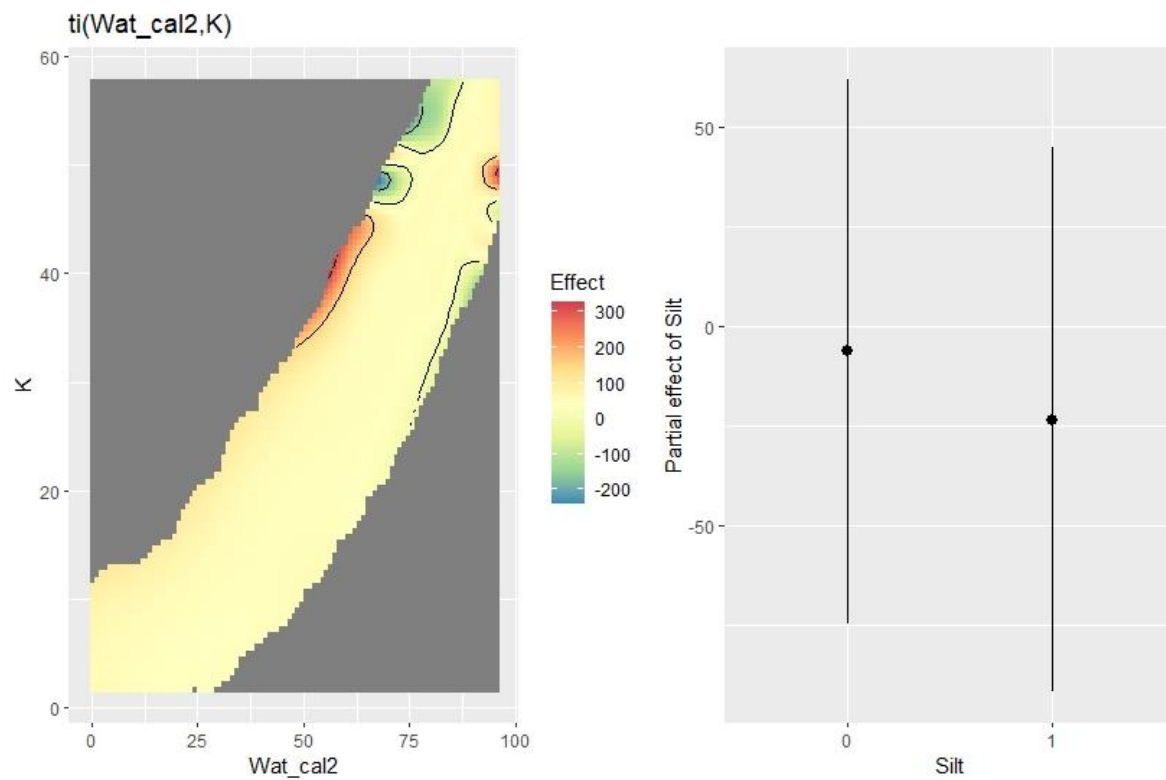

Figure S9: Model WKS

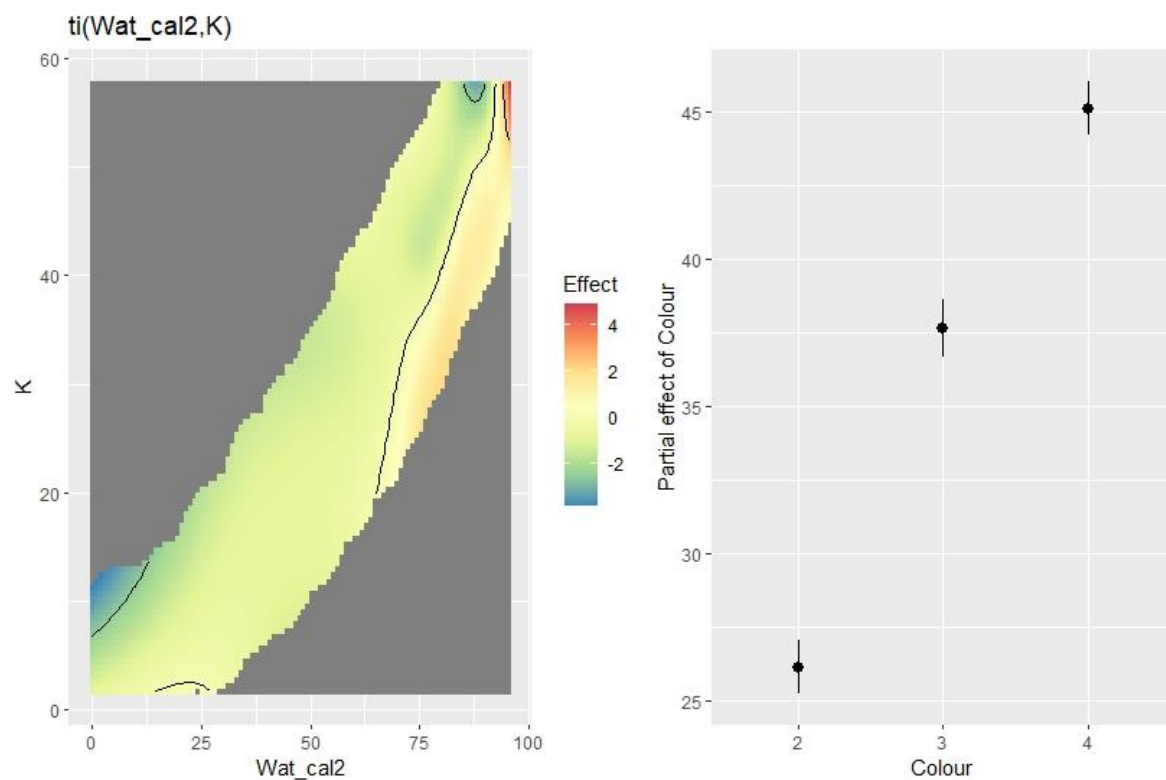

Figure S10: Model WKC

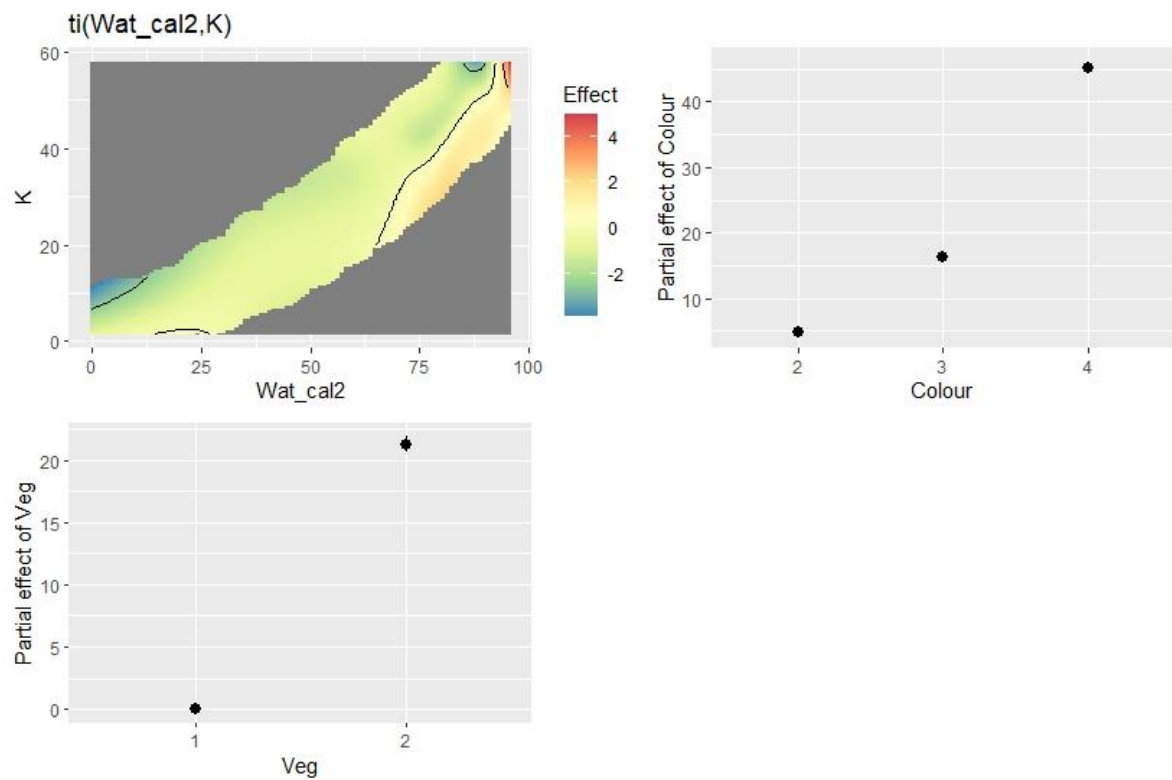

Figure S11: Model WKCV

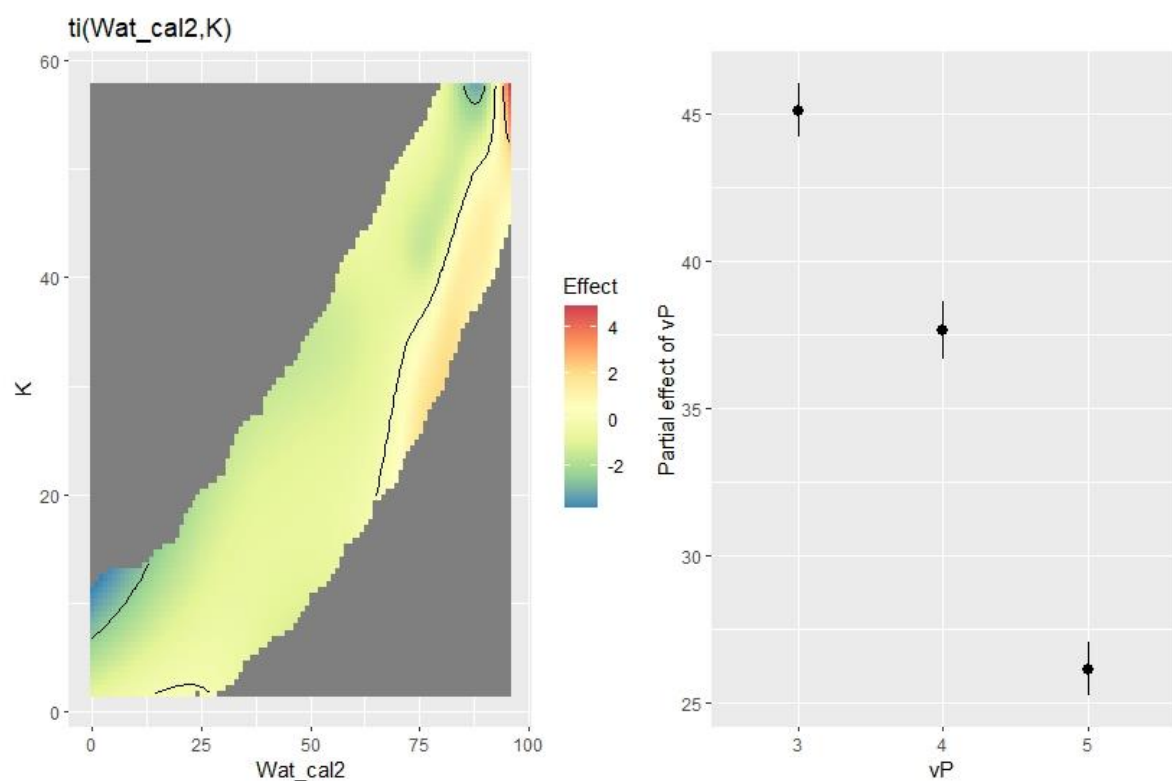

Figure S12: Model WKvP

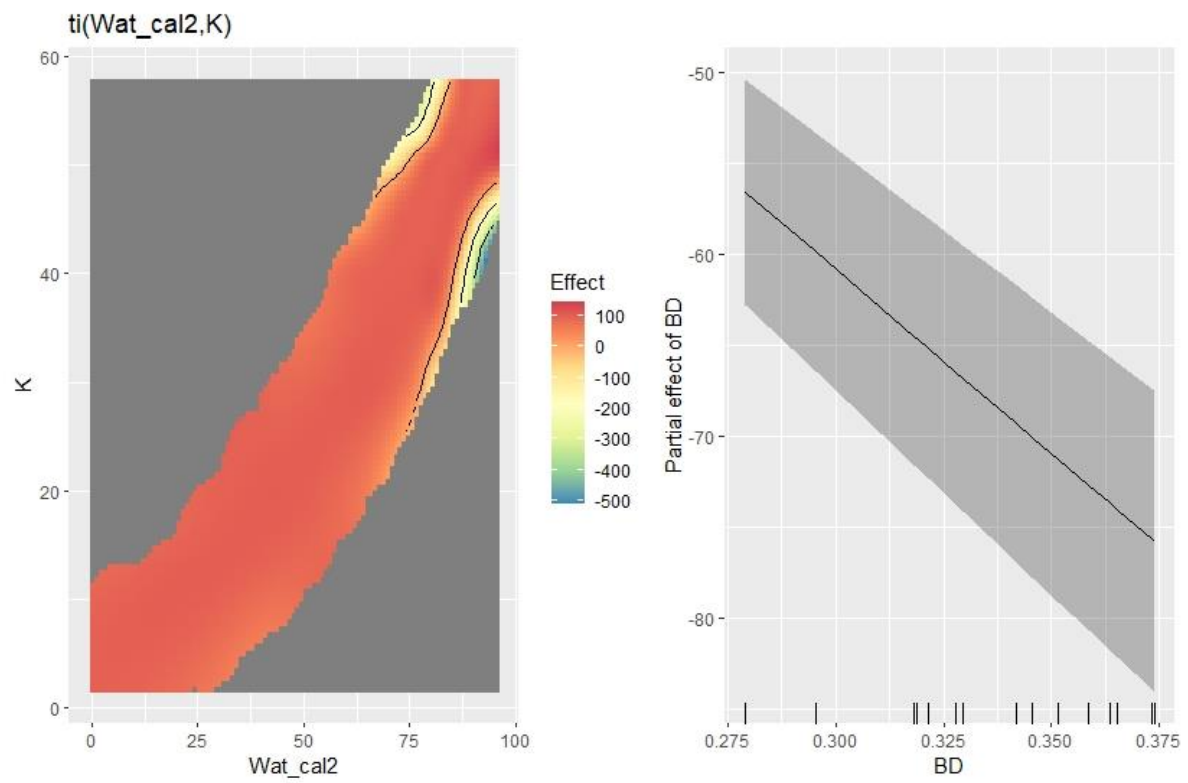

Figure S13: Model WKBD
